# Supplementary material
Source: publisher figshare collection journal article supplement (https://acs.figshare.com/ndownloader/files/4131652)
Supplement: Supplementary file 1 [file 4131652]

**Di- and Tetrametallic Hafnocene Oxamidides Prepared from CO-Induced N<sub>2</sub> Bond Cleavage and Thermal Rearrangement to Hafnocene Cyanide Derivatives.**

*Scott P. Semproni, Grant W. Margulieux and Paul J. Chirik\**

*Department of Chemistry, Princeton University, Princeton, New Jersey, 08544*

[pchirik@princeton.edu](mailto:pchirik@princeton.edu)

Supporting Information

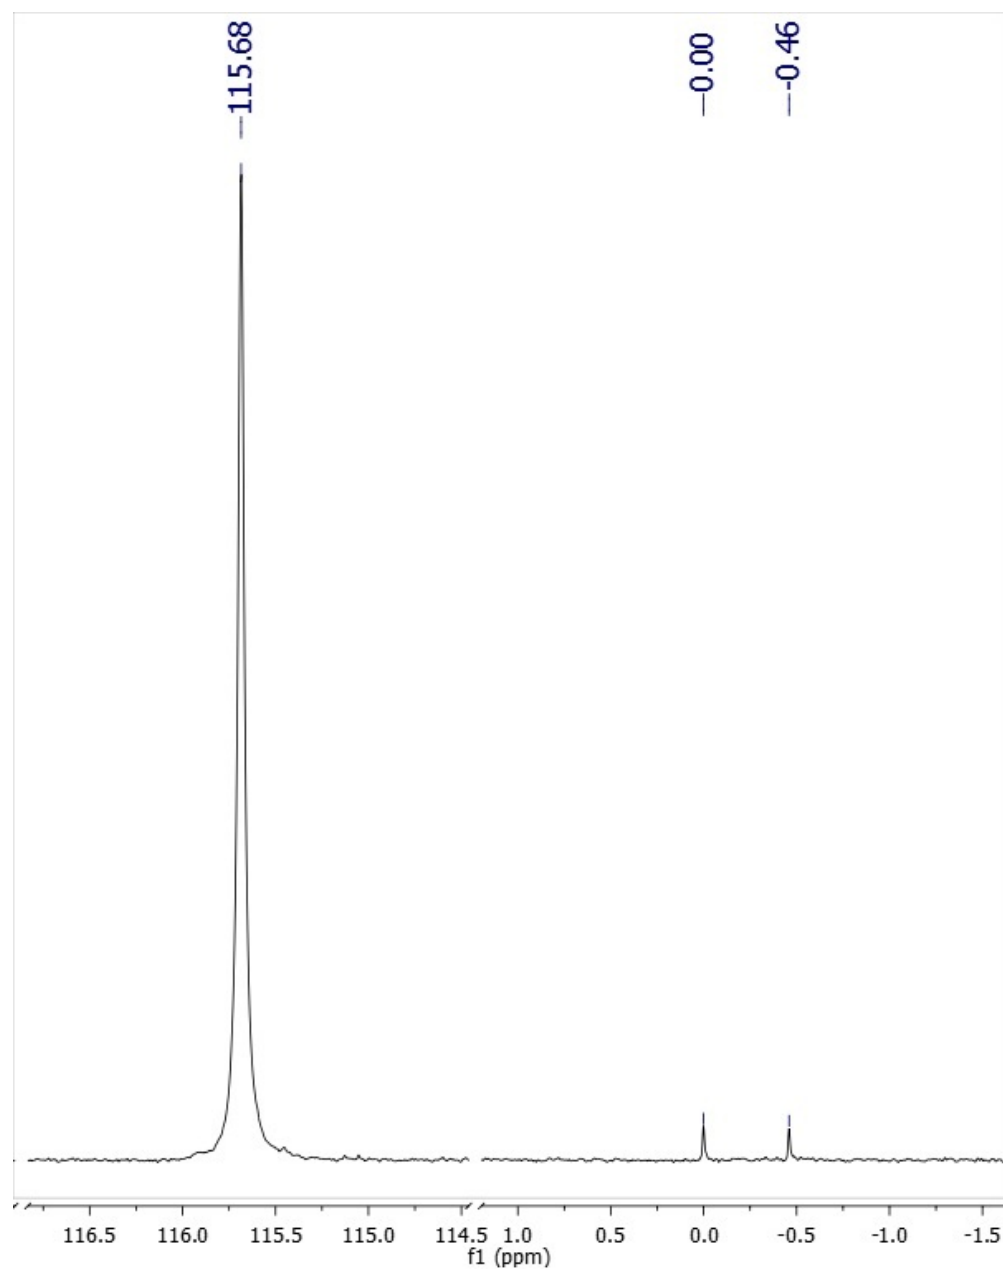

**Figure S1.**  $^{13}\text{C}$  NMR spectrum of  $\text{CH}_3^{13}\text{CN}$  in benzene- $d_6$  at 23 °C.

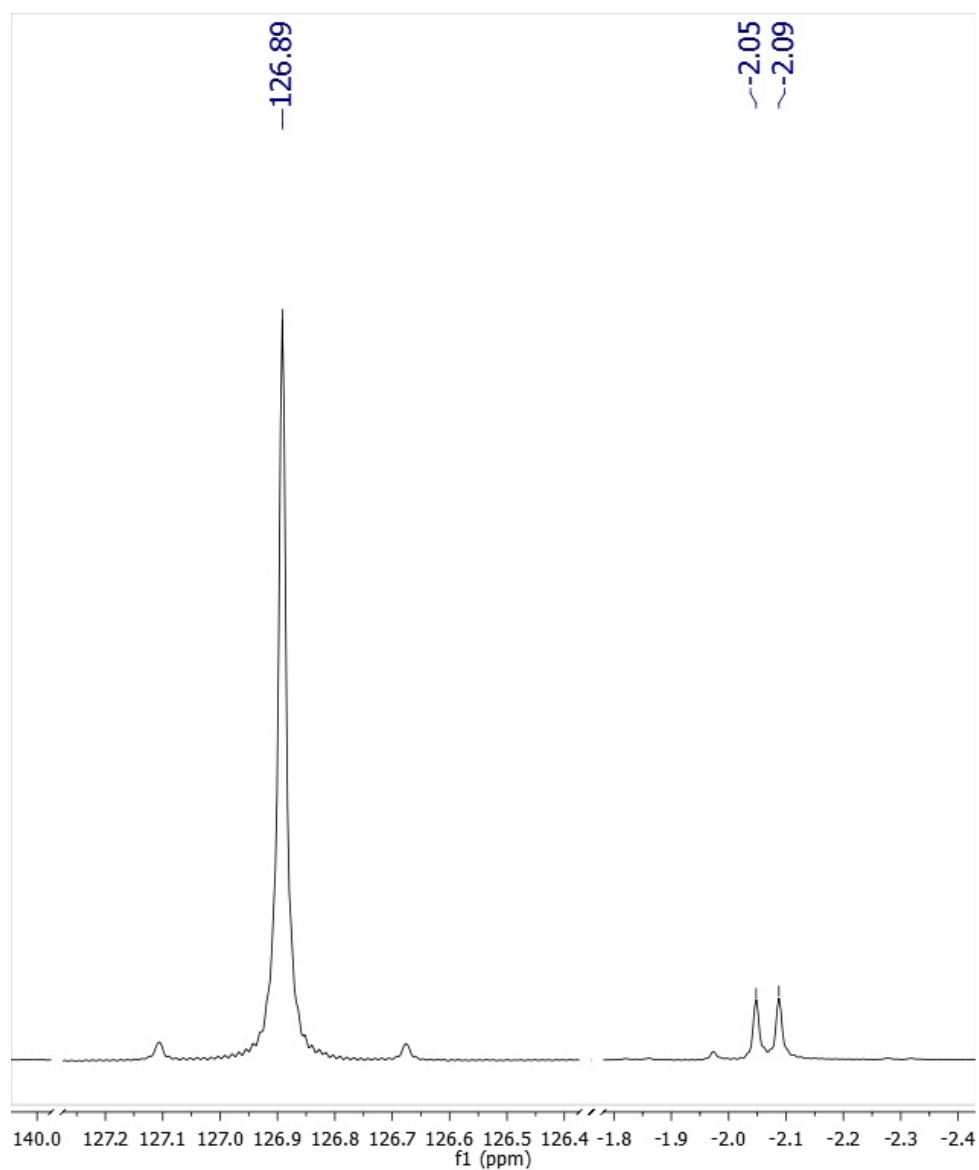

**Figure S2.**  $^{13}\text{C}$  NMR spectrum of  $\text{Me}_3\text{Si}^{13}\text{CN}$  in  $\text{benzene-}d_6$  at  $23^\circ\text{C}$ .

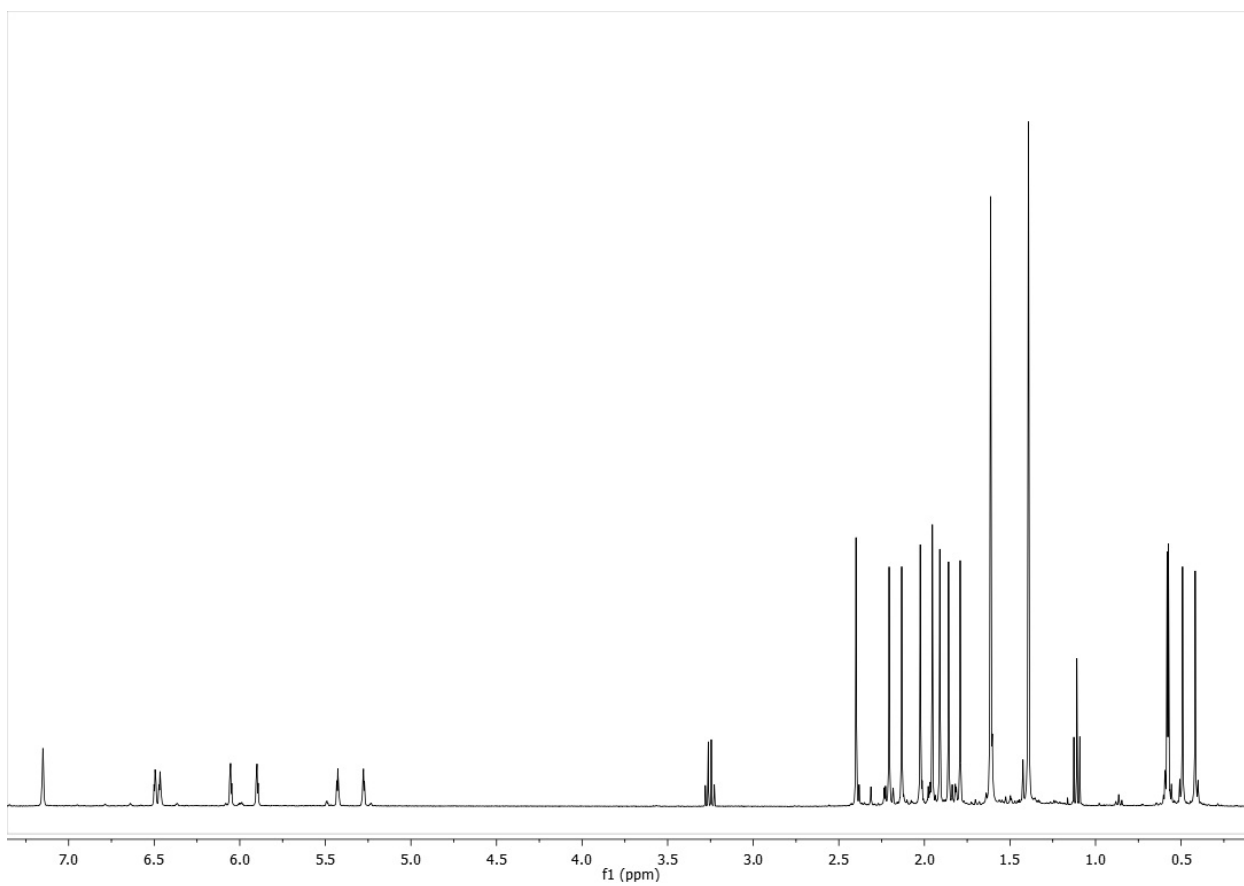

**Figure S3.**  $^1\text{H}$  NMR spectrum of  $[3-(\text{O})(\text{NCO})\text{CN}]$  in benzene- $d_6$ .

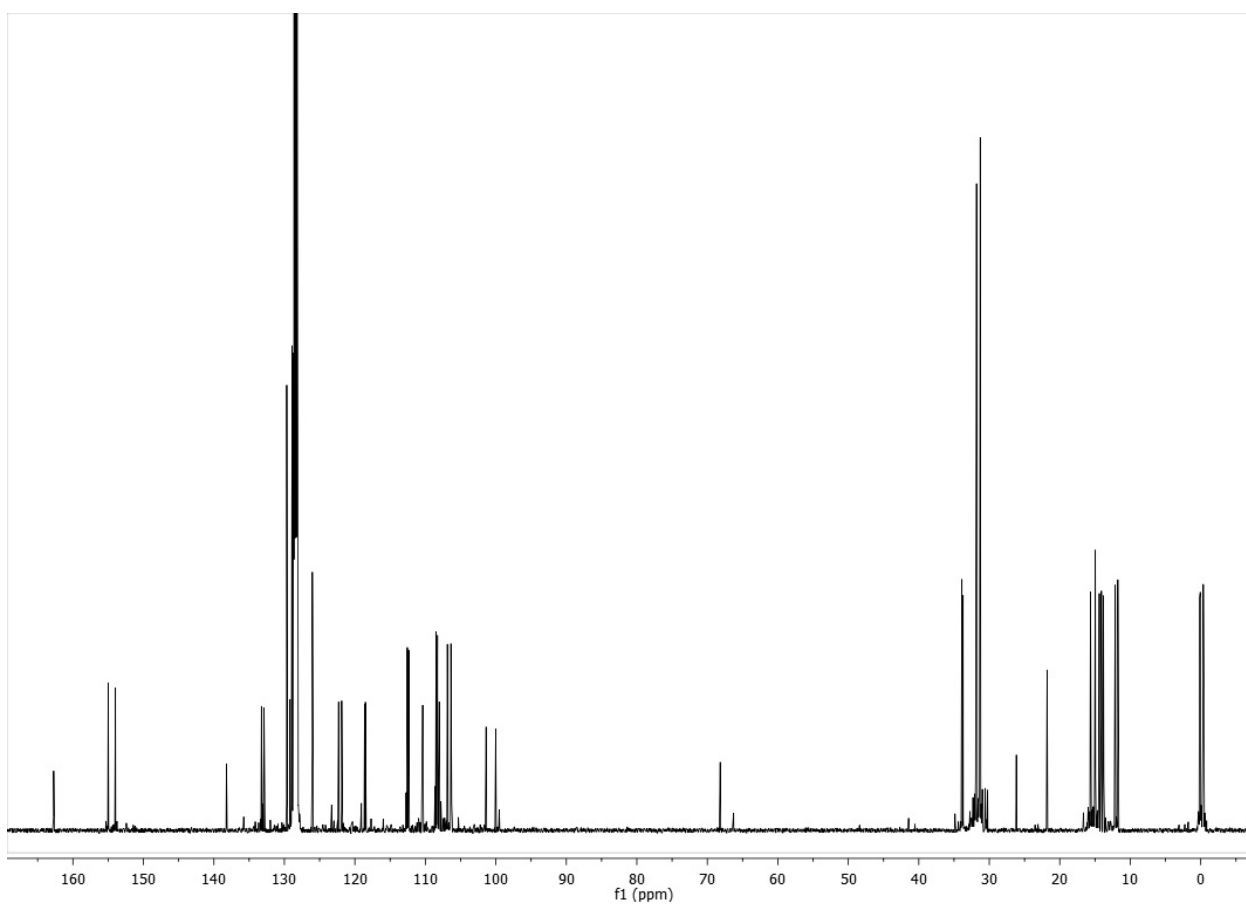

**Figure S4.**  ${}^1\text{H}$ - ${}^{13}\text{C}$  NMR spectrum of [3-(O)(NCO)CN] in benzene- $d_6$ .

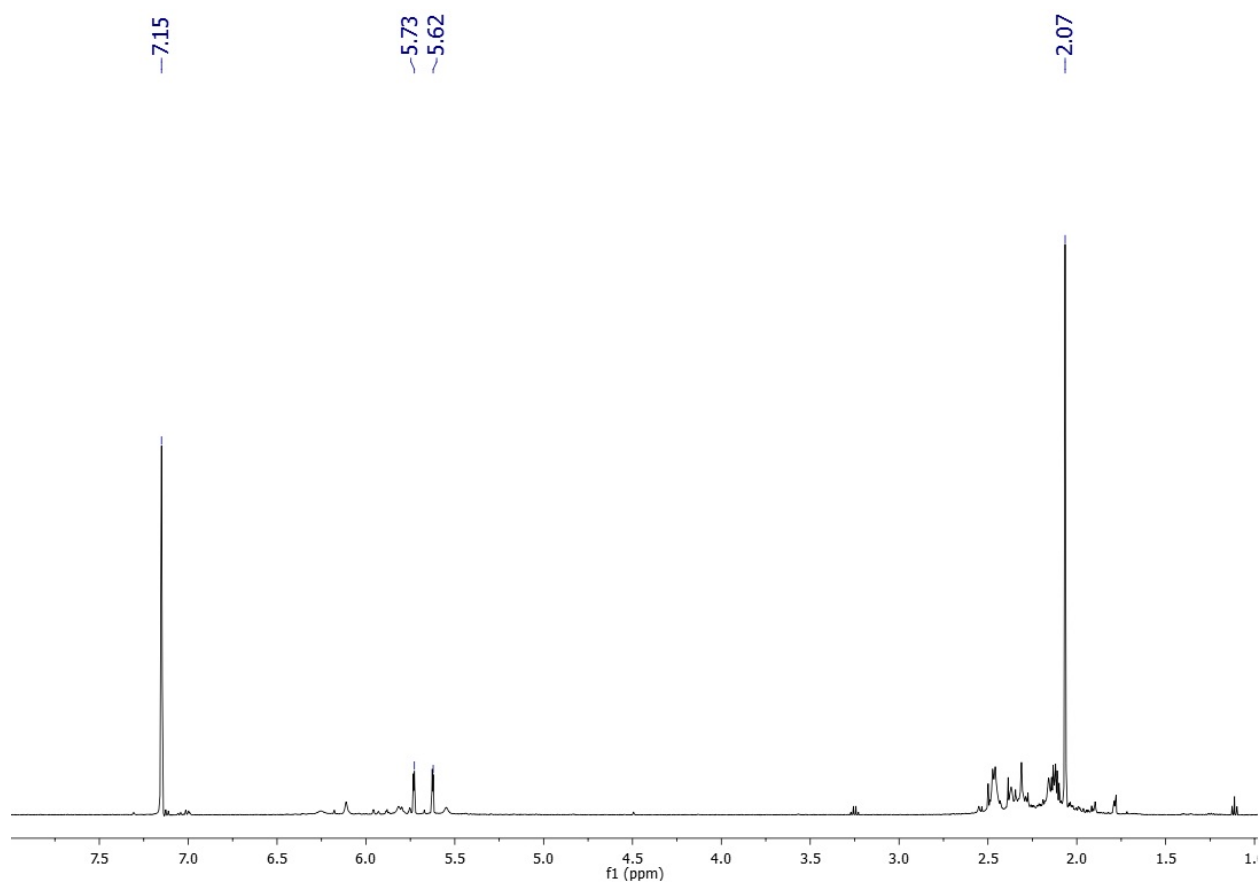

**Figure S5.**  $^1\text{H}$  NMR spectrum of  $[\text{1-(NCO)}]_2$  in benzene- $d_6$ .

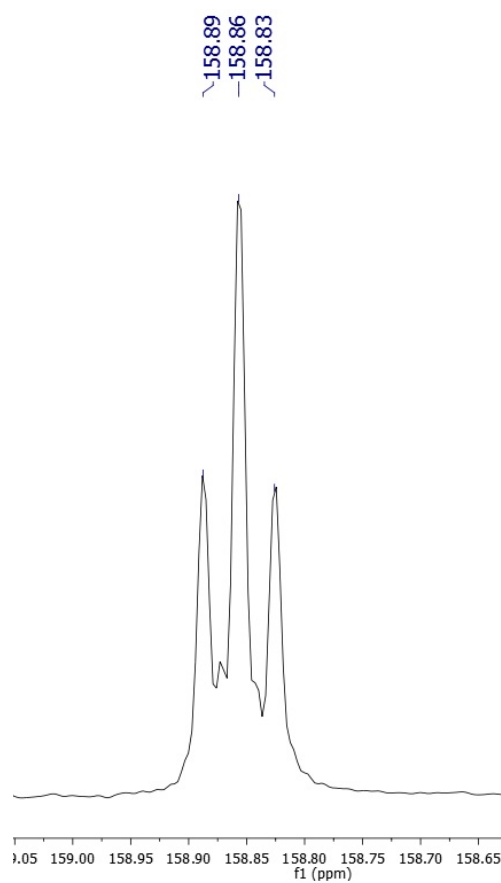

**Figure S6.**  ${}^1\text{H}\text{-}{}^{13}\text{C}$  NMR spectrum of  $[\text{1-}({}^{15}\text{N}{}^{13}\text{CO})]_2$  in benzene- $d_6$ .

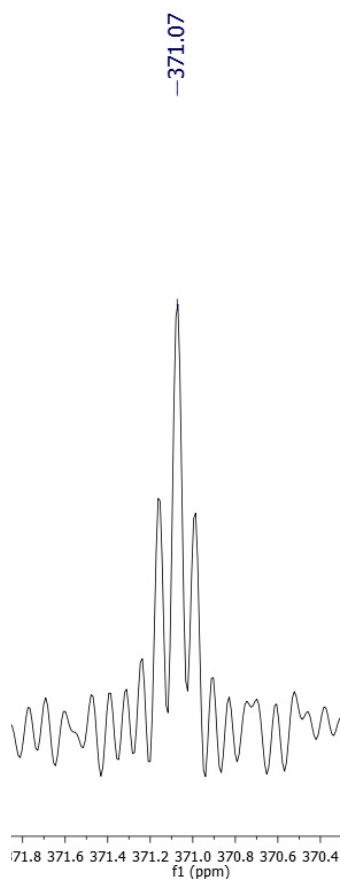

**Figure S7.**  $\{^1\text{H}\}^{15}\text{N}$  NMR spectrum of  $[\text{1-}(^{15}\text{N}^{13}\text{CO})]_2$  in benzene- $d_6$ .



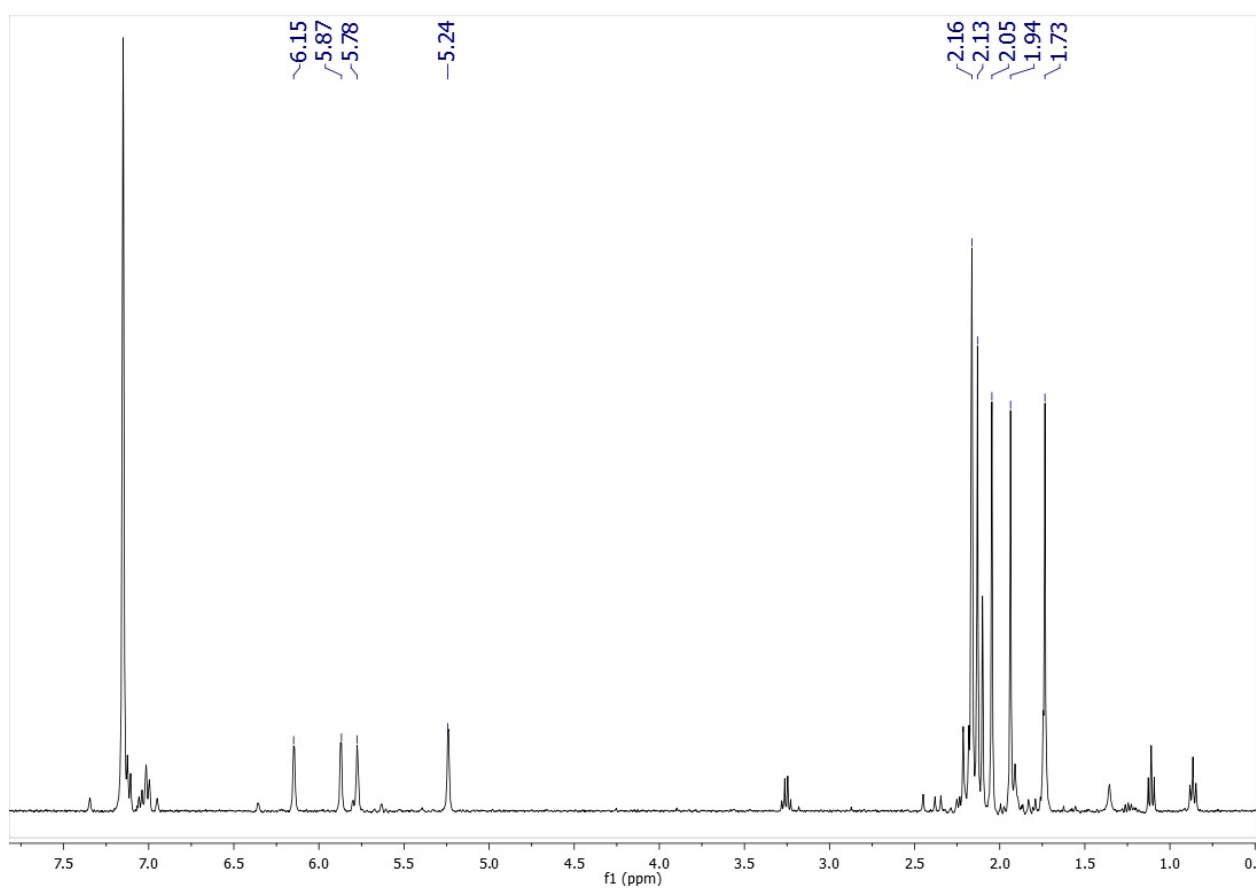

**Figure S8.**  $^1\text{H}$  NMR spectrum of  $[1-(\text{O})(\text{NCO})\text{OTf}]$  in benzene- $d_6$ .

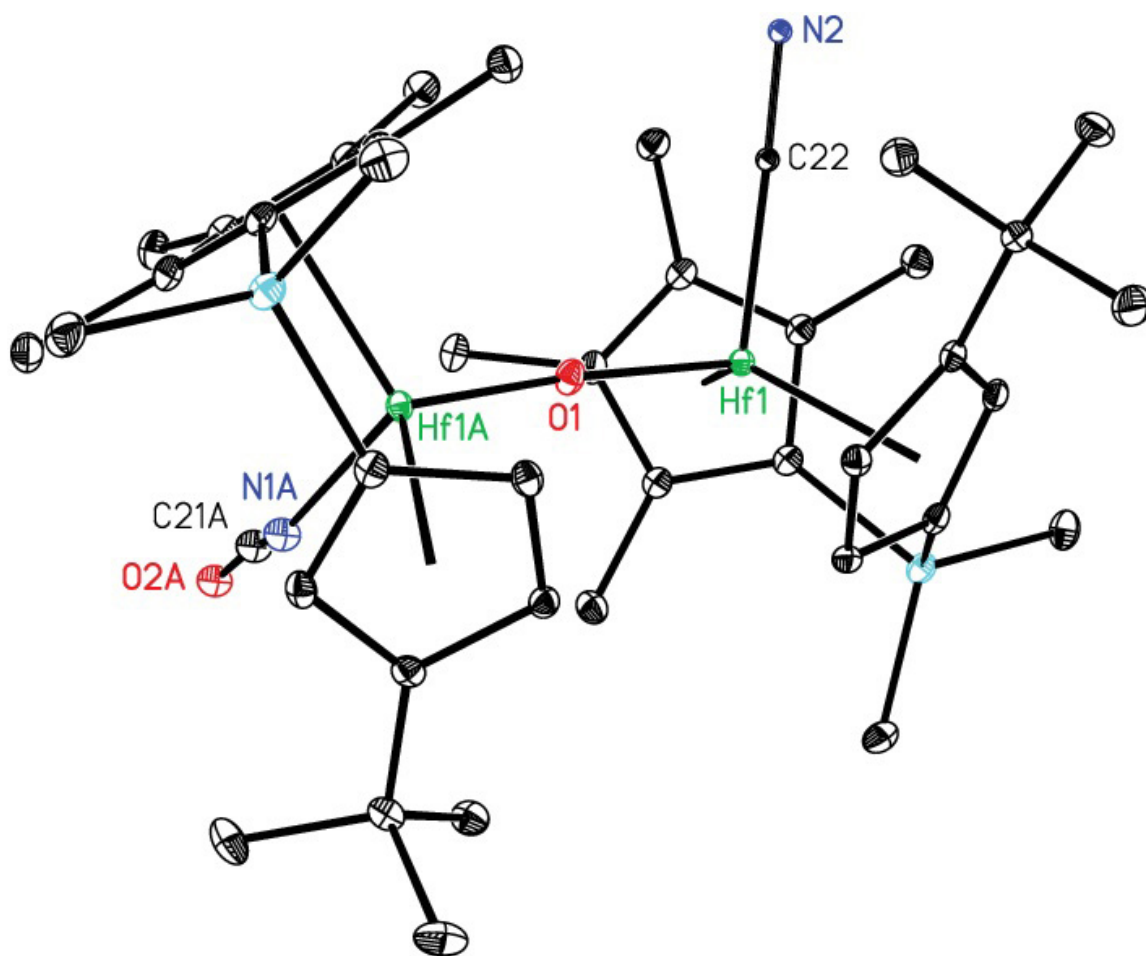

**Figure S9.** Representation of the solid state structure of *(R, R)*-[3-(O)(NCO)CN] at 30% probability ellipsoids. Solvent, hydrogen atoms and disordered cyanide/isocyanate groups omitted for clarity.
